# Supplementary material for: Mesoporous Polymeric Ionic Liquid via Confined Polymerization for Laccase Immobilization towards Efficient Degradation of Phenolic Pollutants
Source: MDPI journal article supplement (doi:10.3390/molecules28062569), 2023-03-12
Supplement: s1 [file s1]

**Supplementary data for:**

**Mesoporous Polymeric Ionic Liquid via Confined Polymerization for Laccase  
Immobilization towards Efficient Degradation of Phenolic Pollutants**

Yu Liang <sup>1</sup>, Xinyan Chen <sup>1</sup>, Jianli Zeng <sup>2</sup>, Junqing Ye <sup>1</sup>, Bin He <sup>1</sup>, Wenjin Li <sup>1</sup> and

and Jian Sun <sup>1,3,\*</sup>

<sup>1</sup> Key Laboratory of Molecular Medicine and Biotherapy in the Ministry of Industry and Information Technology, School of Life Science, Beijing Institute of Technology, Beijing 100081, China

<sup>2</sup> State Key Laboratory of Catalytic Materials and Reaction Engineering, Research Institute of Petroleum Processing, SINOPEC, Beijing 10083, China

<sup>3</sup> Advanced Research Institute of Multidisciplinary Science, Beijing Institute of Technology, Beijing 100081, China

\*Corresponding author email address: [jiansun@bit.edu.cn](mailto:jiansun@bit.edu.cn)

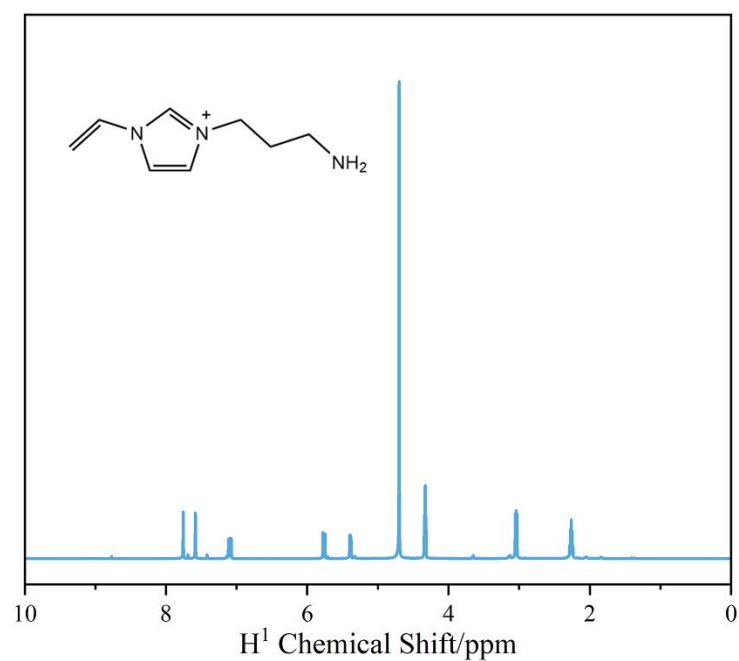

**Figure S1.** The  $^1\text{H}$  NMR of ionic liquids monomer(ILM, [AVIM]Br).

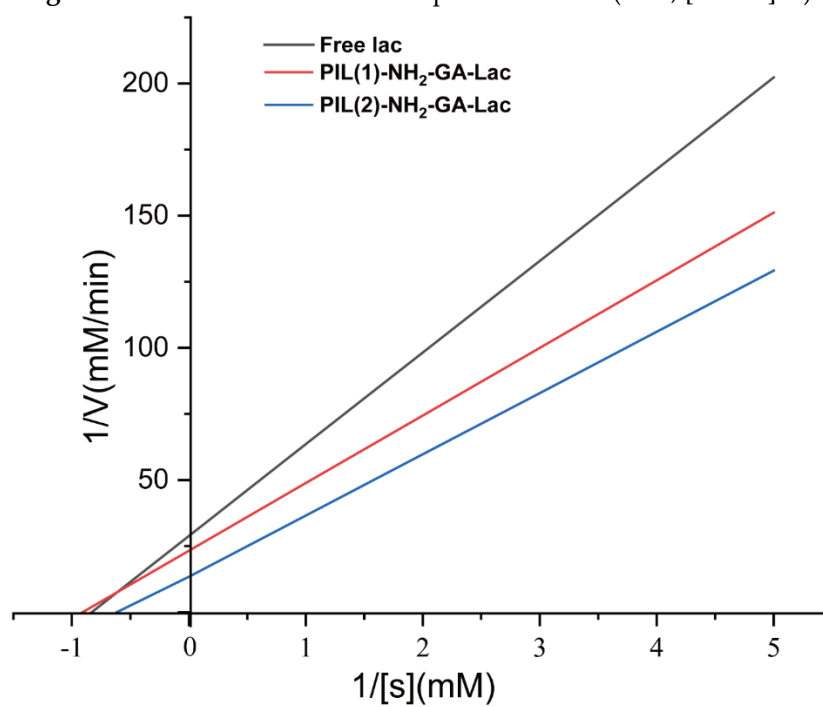

**Figure S2.** Lineweaver-Burk plots of free laccase and immobilized laccase.

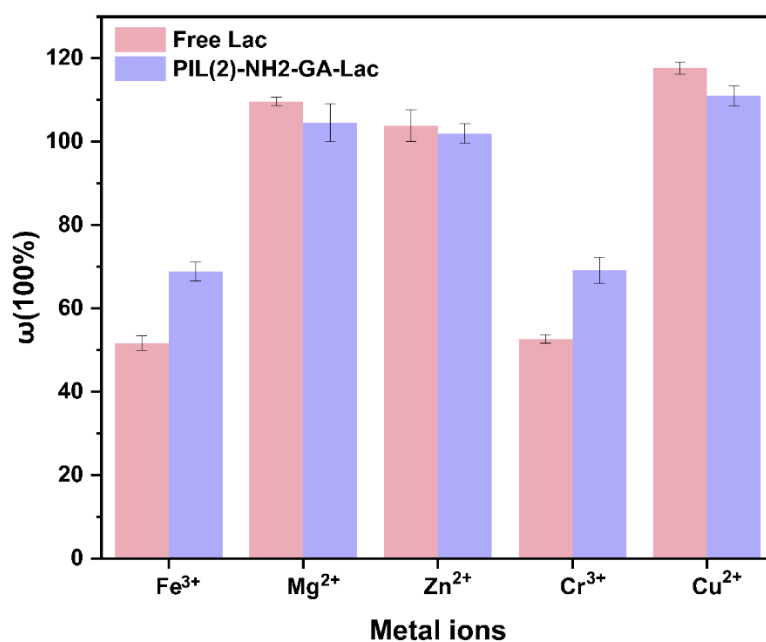

**Figure S3.** Effect of metal ions on laccase activity.

**Table S1.** Different support enzyme loading performance and phenol compounds removal rate.

| Carrier                                 | Enzyme loading (mg/g) | Storage stability (days, Relative activity) | Cycling stability (Times, Relative activity) | Phenolic compound, removal | Ref.      |
|-----------------------------------------|-----------------------|---------------------------------------------|----------------------------------------------|----------------------------|-----------|
| Cu (II)-chelated chitosan nanoparticles | 66                    | /                                           | 8, 50%                                       | Phenol, 87%                | [60]      |
| chitosan–clay                           | 75%                   | 42 d, 55%                                   | 10, 75%                                      | Phenol, 80%                | [24]      |
| Silica                                  | 30                    | /                                           | 5, 61%                                       | Catechol, 95%              | [13]      |
| Chitosan/poly (vinyl alcohol)           | 853                   | 10 d, 60%                                   | 7, 54%                                       | 2,4-DCP, 87.6%             | [21]      |
| magnetic nanoparticles                  | 85.8%                 | 30 d, ~80%                                  | 6, 83%                                       | Phenol, 86.1%              | [36]      |
| PIL-NH <sub>2</sub>                     | 181                   | 15 d, 84%                                   | 10, ~80%                                     | 2,4-DCP, 90%               | This work |
